# Supplementary material for: Green synthesis of δ-lactam from biomass-derived 4-hydroxy-6-methylpyridin-2(1H)-one
Source: Royal Society of Chemistry journal article supplement (doi:10.1039/d2gc04382c), 2023-01-01
Supplement: d2gc04382c1.pdf [file d2gc04382c1.pdf]

## Supporting Information

# Green Synthesis of $\delta$ -Lactam from Biomass-Derived 4-Hydroxy-6-Methylpyridin-2(1H)-one

## 1. Experimental

### Materials and chemicals

Ruthenium (III) chloride (Ru: 37-40%), nickel (II) nitrate hexahydrate (98%), copper (II) nitrate trihydrate (99.9%) and hydrogen hexachloroplatinate (IV) hydrate (Pt: 40%) were provided by Inno-chem Ltd (Beijing, China). Palladium chloride (Pd: 59-60%), iron (III) nitrate nonahydrate (99.9%) and cobalt nitrate hexahydrate (99.9%) were purchased from the Meryer CO. LTD (Shanghai, China). 4-Hydroxy-6-methyl-2-pyrone (TAL, 98%), 6-methylpiperidin-2-one (MPO,  $\geq 95\%$ ) and diisopropylamine (DPA) were obtained from Aladdin (China). MeOH, EtOH, 1-PrOH, 2-PrOH, 2-BuOH, *t*-BuOH, cyclohexanol, *t*-amyl alcohol and ammonia solution (25-28%) were provided by J&K Scientific Ltd (China). All the chemical reagents were used as received without further purification. Ketjenblack, EC-300J (carbon support) was purchased from Yilongsheng Energy Technology Co. Ltd (Suzhou, China). Mesoporous carbon (CMK-3, specific surface area  $\geq 800$  m<sup>2</sup>/g, pore size: 5-7 nm) was purchased from Xianfeng XF Nano Materials Technology Co. Ltd (China). The other catalyst supports like  $\gamma$ -Al<sub>2</sub>O<sub>3</sub> and H-Y zeolite (Si: Al= 5:3) were provided by Energy Chemical (China). Pd (10 wt.)/C and Pt (10 wt.)/C were provided by Aladdin (China).

### Catalyst Preparation:

The carbon supported Ni-Ru bimetallic catalysts were prepared *via* co-impregnation using metal precursors RuCl<sub>3</sub> and Ni(NO<sub>3</sub>)<sub>2</sub>·6H<sub>2</sub>O. Specifically, a calculated amount of metal precursor was first dissolved into a given amount of H<sub>2</sub>O (2 mL), then slowly added the carbon supported (200 mg) under stirring. The obtained solid were dried at 80 °C overnight under vacuum. The dried catalysts were activated under H<sub>2</sub>/Ar (H<sub>2</sub>:

10%) atmosphere at 500 °C/3 h. The mono-metallic Ni/C and Ru/C were synthesized by the similar impregnation method.

The other bimetallic catalysts like Ni-Pd/C, Ni-Pt/C, Cu-Ru/C, Fe-Ru/C and Co-Ru/C were prepared from the corresponding metal precursor through the above-mentioned procedures.

### **Catalytic Reaction:**

#### *Transfer hydrogenation/hydrogenolysis of HMPO to MPO with 2-PrOH*

4-Hydroxy-6-methylpyridin-2(1H)-one (HMPO) was prepared through the amino-lysis of biomass-derived triacetic acid lactone (TAL) according to the reported method [1]. The catalytic reactions were carried out in a 15 mL Teflon-lined stainless-steel autoclave. In a typical experiment, catalyst (60 mg), HMPO (0.1275g, 1 mmol) and 2-PrOH (2 mL) were added into the autoclave. The autoclave was sealed and purged with N<sub>2</sub> three times to remove residual air. The catalytic reaction was performed at desired temperature and nitrogen pressure under magnetic stirring of 835 rpm. The reaction was stopped after certain periods of time, and the reactor was cool down in an ice bath instantly. The liquid phase was separated from the mixture by filtration. The qualitative analysis of reaction products was carried out on a GC-MS system (Agilent 7890A-5975C), and the quantitative analysis was conducted on a GC system (Agilent 8890B) equipped with an HP-5 column and an FID detector. Decane was used as an internal standard.

In the recycling experiments, the used catalyst was separated by centrifugation and washed with 2-PrOH several times, and was reduced at 500 °C for 3 h under H<sub>2</sub>/Ar (H<sub>2</sub>:10%) atmosphere after drying overnight at 80 °C under vacuum. The recovered catalyst was reused for the next cycle.

### **Catalyst Characterization:**

Powder X-ray diffraction (XRD) patterns were obtained on a Rigaku Ultima IV X-ray diffractometer using Cu K $\alpha$  radiation at 35 kV and 25 mA ( $\lambda = 1.5405 \text{ \AA}$ ) over a  $2\theta$  ranging from 5° to 90 ° at a scanning speed of 5°/min.

Transmission electron microscopy (TEM) was performed on a JEOL JEM-2100

microscope at an accelerating voltage of 200 kV.

X-ray photoelectron spectroscopies (XPS) were carried out using Al  $K\alpha$  ( $h\nu = 1486.36$  eV) radiation with a Thermo Scientific K-Alpha spectrometer. The peak positions were referenced internally to the C 1s peak at 284.6 eV.

The metal contents of the catalysts were determined by inductively coupled plasma atomic emission spectrometry (ICP-AES).

Nitrogen adsorption-desorption analysis was carried out at 77 K using a BEL-SORP-MAX adsorption analyzer. The samples were degassed at 300 °C for 3 h under vacuum before the measurement. The specific surface areas were obtained by the Brunauer-Emmett-Teller (BET) method.

H<sub>2</sub>-temperature programmed reduction (H<sub>2</sub>-TPR) was carried out on a Chemisorption Analyzer (Micromeritics AutoChem II 2920) equipped with a thermal conductivity detector (TCD). For H<sub>2</sub>-TPR analysis, about 60 mg of sample was used for each measurement and pretreated in an Ar flow at 200 °C for 2 h. TPR was initiated from 50 °C to 700 °C at 10 °C/min with a mixture flow of 10% H<sub>2</sub>/Ar (20 mL/min).

## 2. Supplementary figures and tables

**Table S1** ICP-AES analysis results of mono- and Ni-Ru bimetallic catalysts.

| Ent. | Catalysts                                | Ru(wt.%) | Ni(wt.%) |
|------|------------------------------------------|----------|----------|
| 1    | Ru/C                                     | 2.71     | -        |
| 2    | Ni <sub>1</sub> -Ru <sub>10</sub> /C     | 4.07     | 1.18     |
| 3    | Ni <sub>2</sub> -Ru <sub>10</sub> /C     | 3.92     | 1.77     |
| 4    | Ni <sub>3</sub> -Ru <sub>10</sub> /C     | 3.65     | 2.32     |
| 5    | Ni <sub>4</sub> -Ru <sub>10</sub> /C     | 4.14     | 3.16     |
| 6    | Ni <sub>5</sub> -Ru <sub>10</sub> /C     | 4.64     | 3.74     |
| 7    | Ni <sub>3</sub> -Ru <sub>10</sub> /CMK-3 | 3.56     | 3.37     |
| 8    | Ni <sub>3</sub> -Ru <sub>10</sub> /H-Y   | 2.13     | 2.41     |

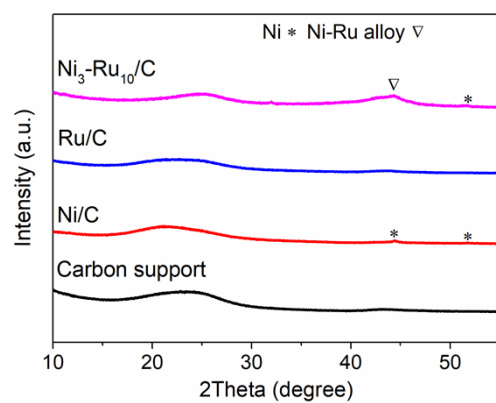

**Fig. S1** XRD patterns of different supported catalysts on carbon support.

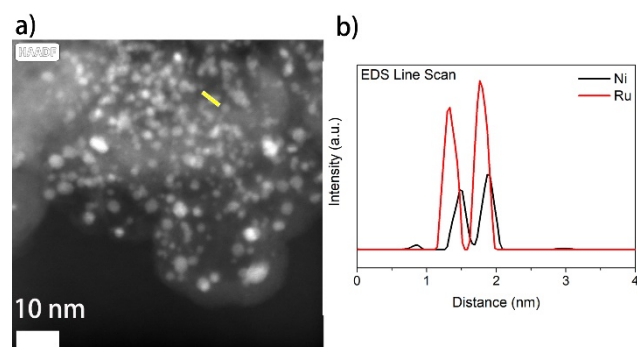

**Fig. S2** The HADDF-STEM image (a) and the corresponding EDS line scan (b, marked by yellow line in the figure a) of  $\text{Ni}_3\text{-Ru}_{10}/\text{C}$  catalyst.

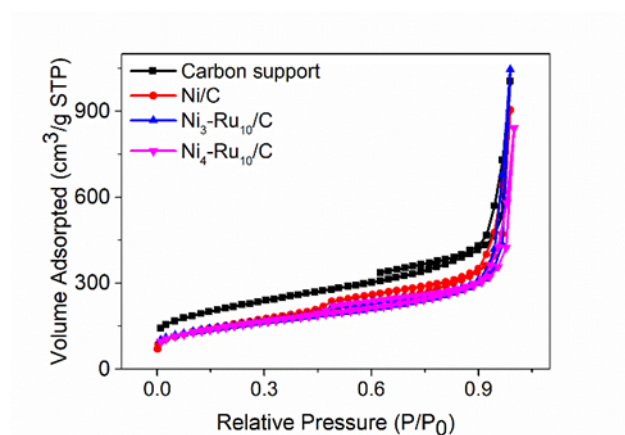

**Fig. S3** N<sub>2</sub> adsorption-desorption isotherms of supported monometallic, bimetallic Ni-Ru catalysts and carbon support.

**Table S2** Porosity properties of the mono- and bimetallic catalysts.

| Ent. | Sample                               | Surface area<br>(m <sup>2</sup> /g) <sup>a</sup> | Total Pore<br>volume<br>(cm <sup>3</sup> /g) <sup>b</sup> | Pore size<br>(nm) <sup>c</sup> |
|------|--------------------------------------|--------------------------------------------------|-----------------------------------------------------------|--------------------------------|
| 1    | Carbon Support                       | 761.9                                            | 1.55                                                      | 5.8                            |
| 2    | Ni/C                                 | 546.0                                            | 1.40                                                      | 3.8                            |
| 3    | Ni <sub>3</sub> -Ru <sub>10</sub> /C | 537.7                                            | 1.52                                                      | 3.8                            |
| 4    | Ni <sub>4</sub> -Ru <sub>10</sub> /C | 528.6                                            | 1.30                                                      | 3.8                            |

a) Surface area was calculated by the Brunauer–Emmett–Teller (BET) method; b) Total pore volume was obtained using the adsorption branch of the N<sub>2</sub> isotherm at P/P<sup>0</sup> = 0.99; c) Average pore diameter was determined from the local maximum of the BJH distribution of pore diameters obtained in the adsorption branch of the N<sub>2</sub> isotherm.

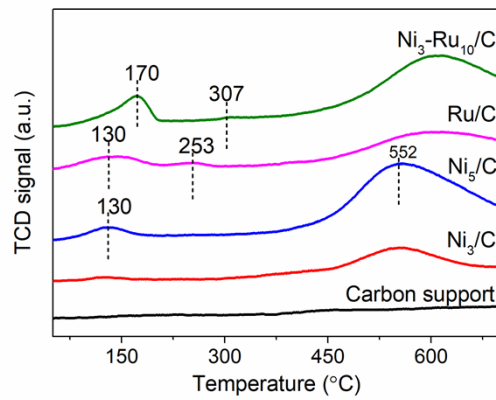

**Fig. S4** H<sub>2</sub>-TPR profiles of bimetallic Ni-Ru catalyst, monometallic Ru or Ni catalysts and carbon support.



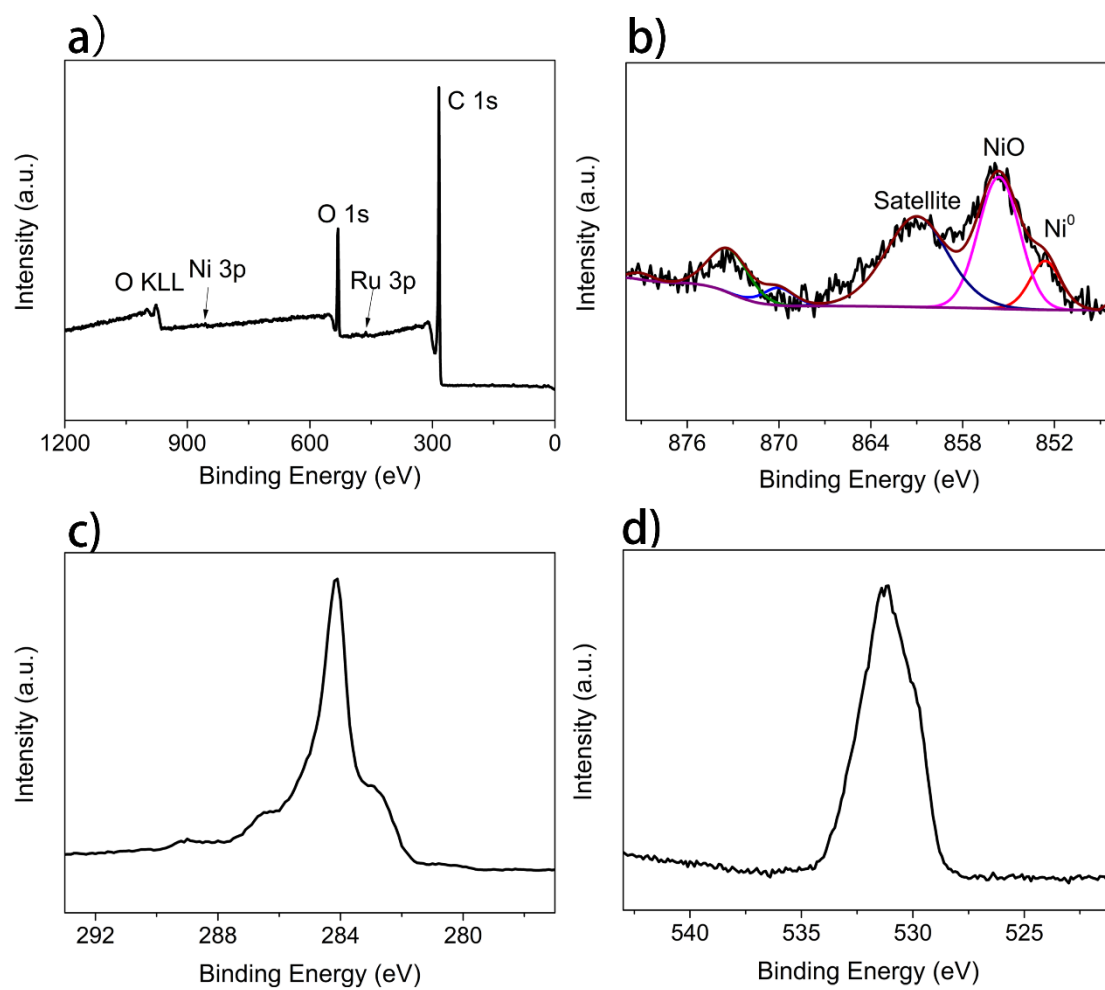

**Fig. S5** The XPS spectra of Ni<sub>3</sub>-Ru<sub>10</sub>/C catalyst: a) survey spectrum; b) Ni 2p XPS spectrum; c) C 1s XPS spectrum; d) O 1s XPS spectrum.

**Table S3** The influences of alcohol hydrogen donors for CTH of HMPO into  $\delta$ -Lactams (MPO) over Ni<sub>3</sub>-Ru<sub>10</sub>/C catalyst.<sup>a</sup>

| Ent. | Solvent      | MPO yield<br>(%) <sup>b,c</sup> | DPA<br>Yield<br>(%) <sup>b,c</sup> |
|------|--------------|---------------------------------|------------------------------------|
| 1    | MeOH         | -                               | -                                  |
| 2    | EtOH         | 5.3                             | -                                  |
| 3    | 1-PrOH       | 6.5                             | -                                  |
| 4    | 2-PrOH       | 83.5                            | 14.8                               |
| 5    | 2-BuOH       | 63.7                            | -                                  |
| 6    | cyclohexanol | 14.2                            | -                                  |
| 7    | t-BuOH       | -                               | -                                  |
| 8    | t-pentanol   | -                               | -                                  |

a) Reaction conditions: **HMPO** (125 mg, 1 mmol), Ni<sub>3</sub>-Ru<sub>10</sub>/C catalyst 60 mg, alcohol 2 mL, N<sub>2</sub> 1.5 MPa, 180 °C/ 12 h; b) **MPO** and **DPA** yield were determined by GC with decane as the internal standard; c) **HMPO**: 4-hydroxy-6-methylpyridin-2(1H)-one, **MPO**: 6-methylpiperidin-2-one, **DPA**: diisopropylamine.

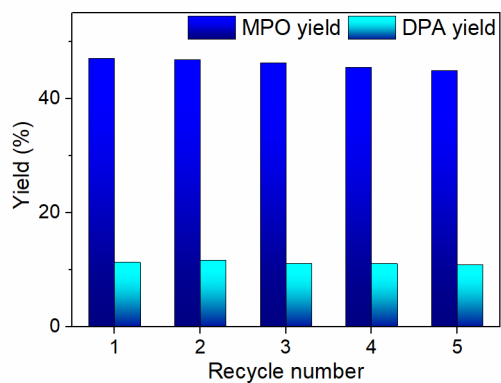

**Fig. S6** The recyclability of  $\text{Ni}_3\text{-Ru}_{10}/\text{C}$  catalyst at the initial stage, reaction conditions: HMPO 2 mmol, catalyst 120 mg, 2-PrOH 4 mL,  $\text{N}_2$  1.5 MPa, 180 °C, 3 h.

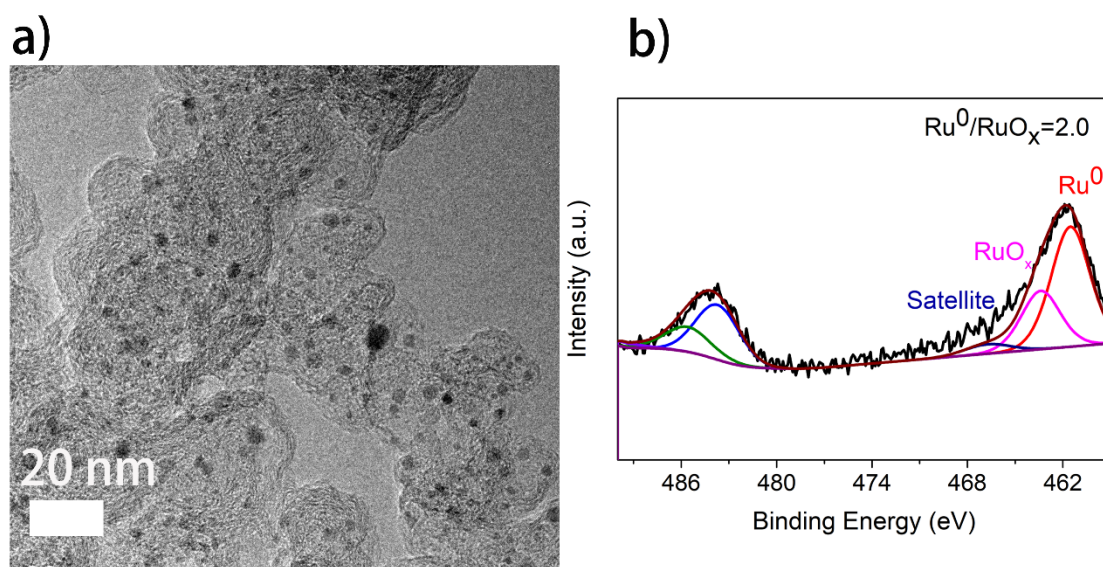

**Fig. S7** a) TEM image and b) Ru 3p XPS spectroscopy of the recovered  $\text{Ni}_3\text{-Ru}_{10}/\text{C}$  catalyst after reusing for five times.

**Fig. S8** GC-HRMS spectra of the reaction mixture for CTH of HMPO using Ni<sub>3</sub>-Ru<sub>10</sub>/C catalyst.

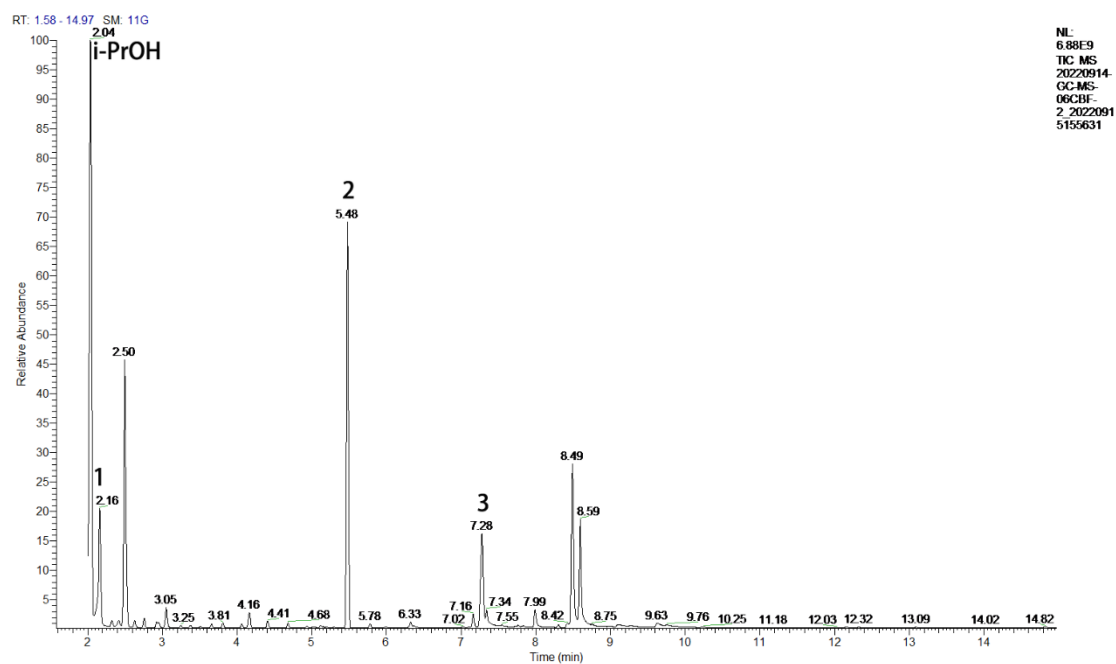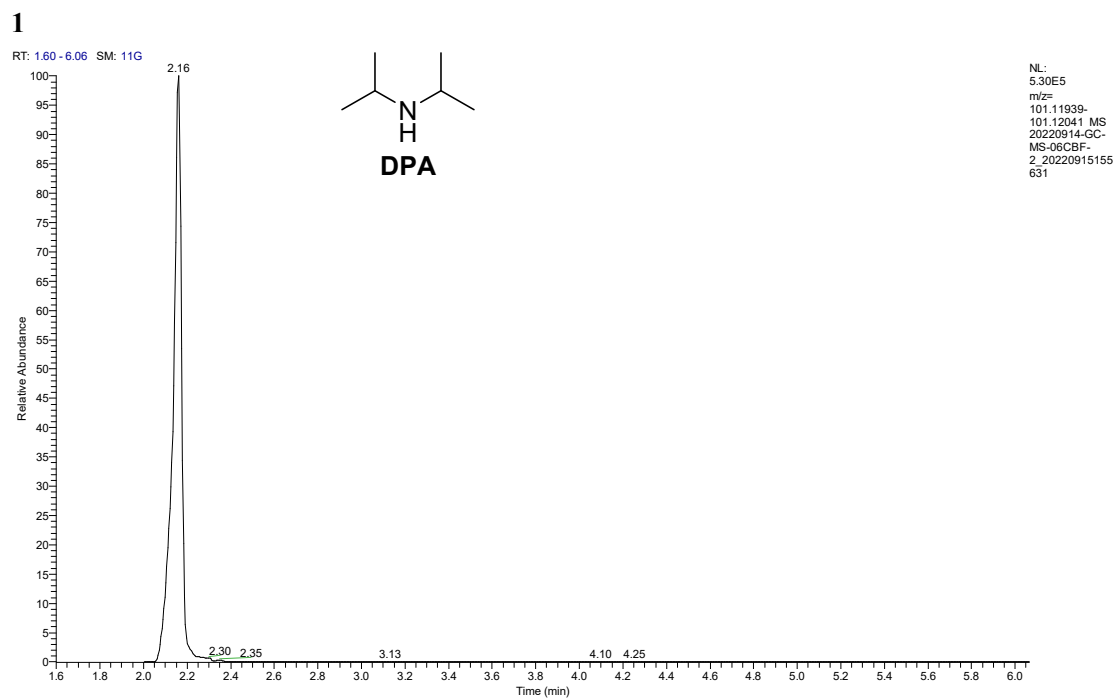

20220914-GC-MS-06CBF-2\_20220915155631 #34 RT: 2.16 AV: 1 SB: 2 7.41, 7.46 NL: 4.76E8  
T: FTMS + p EI Full ms [35.0000-300.0000]

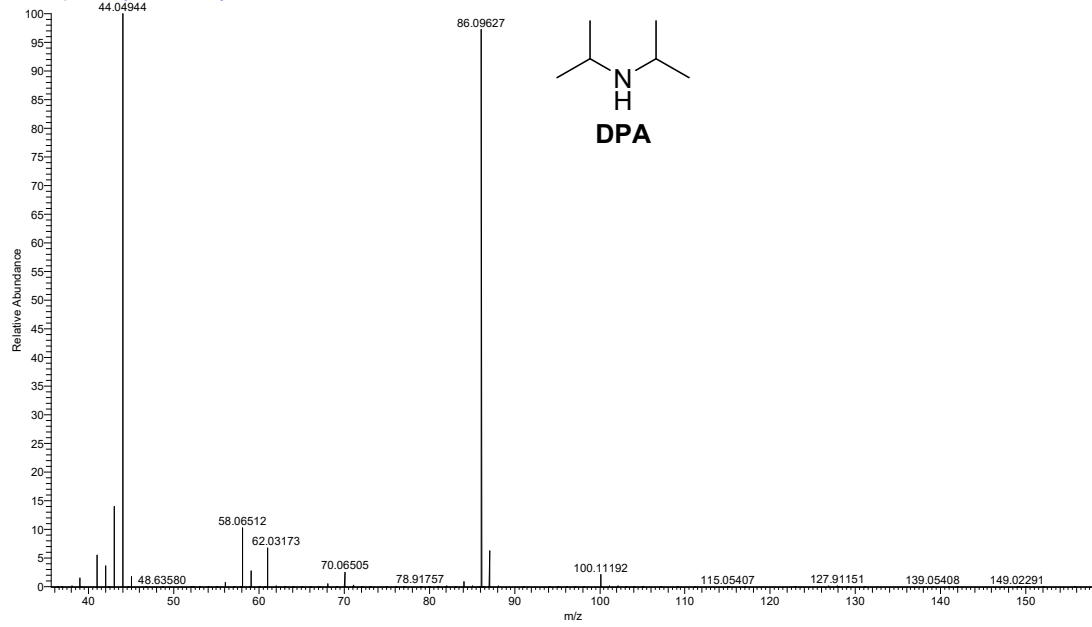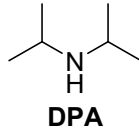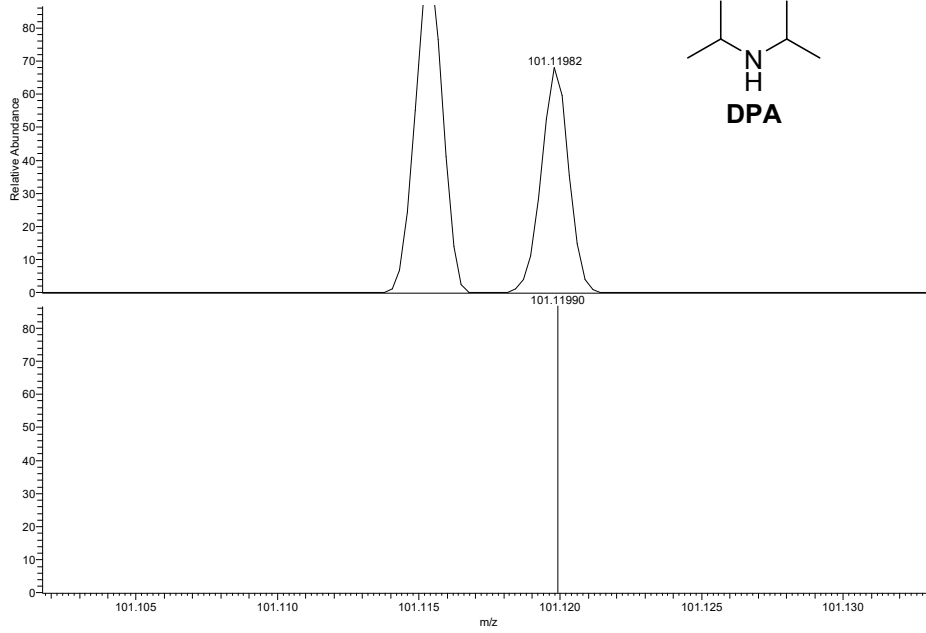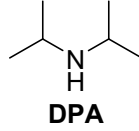

NL:  
8.05E5  
20220914-GC-MS-06CBF-  
2\_20220915155631#34 RT:  
2.16 AV: 1 SB: 2 7.41, 7.46  
T: FTMS + p EI Full ms  
[35.0000-300.0000]

NL:  
9.32E5  
C<sub>6</sub>H<sub>15</sub>N  
C<sub>6</sub>H<sub>15</sub>N<sub>1</sub>  
pa Chrg 1

2

RT: 1.56 - 11.79 SM: 11G

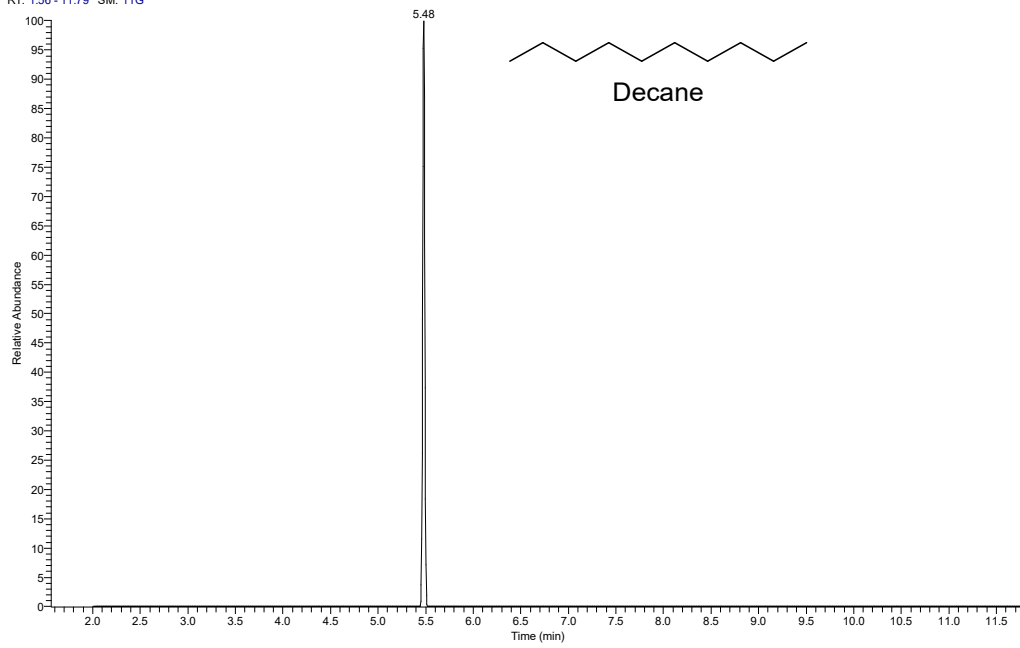

NL:  
1.03E6  
m/z=  
142.17089-  
142.17231 MS  
20220914-GC-  
MS-06CBF-  
2\_20220915155  
631

20220914-GC-MS-06CBF-2\_20220915155631 #773 RT: 5.48 AV: 1 SB: 2 7.41, 7.46 NL: 1.69E9  
T: FTMS + p EI Full ms [35.0000-300.0000]

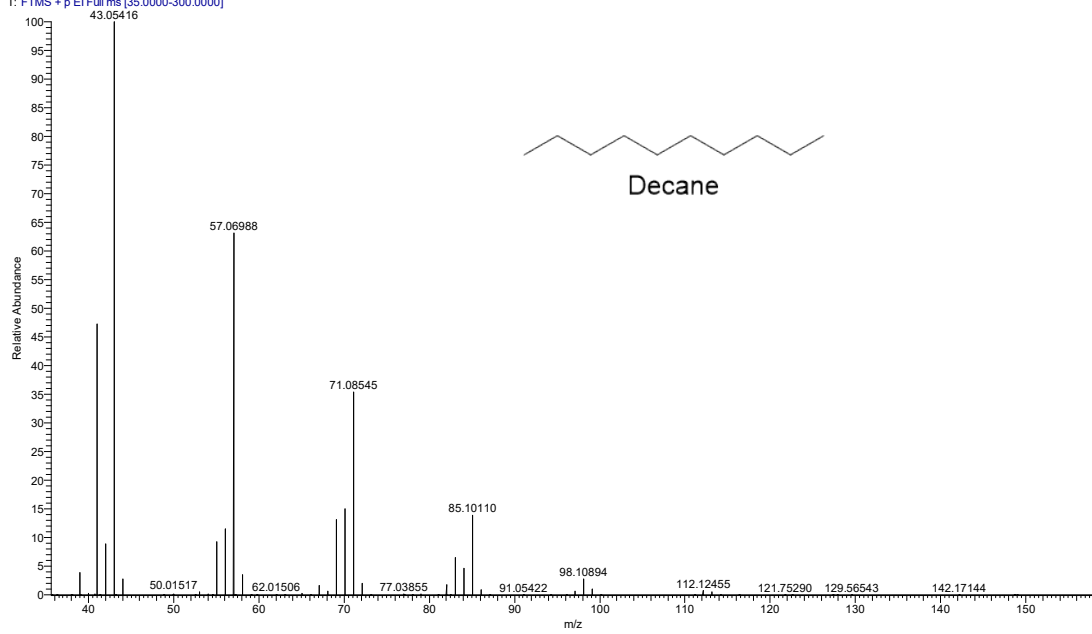

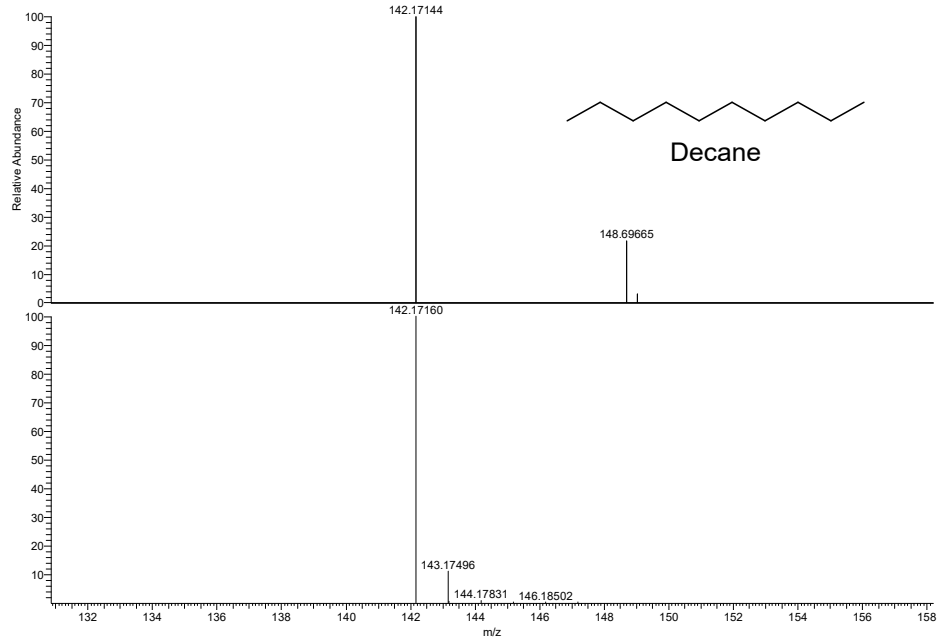

3

RT: 6.33 - 7.94 SM: 11G

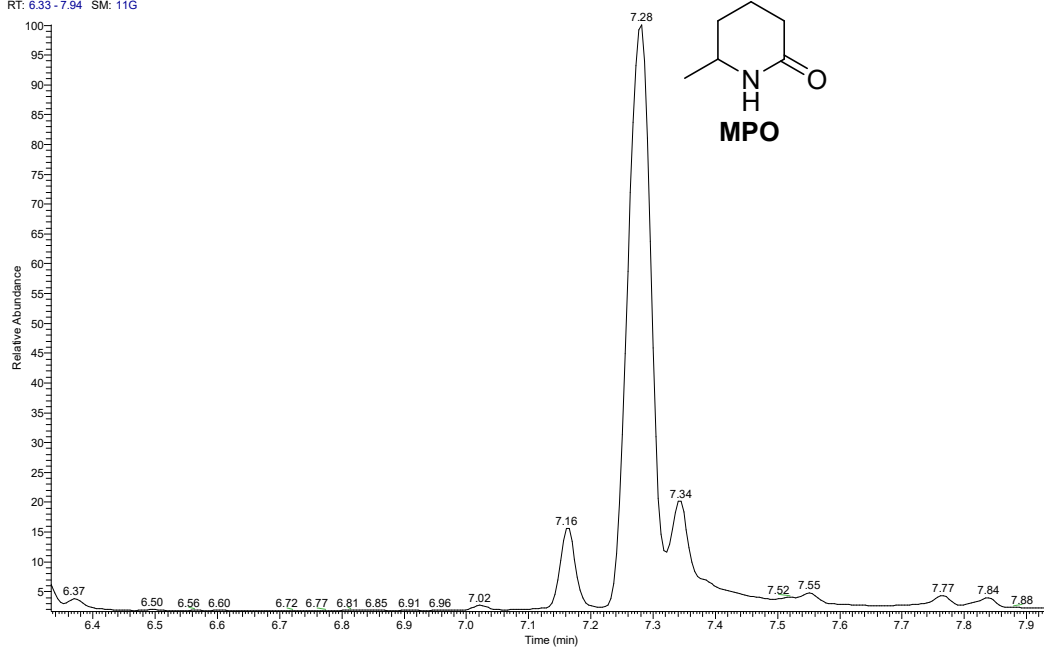

20220914-GC-MS-06CBF-2\_20220915155631 #1174 RT: 7.28 AV: 1 SB: 2 7.41, 7.46 NL: 6.39E8  
T: FTMS + p EI Full ms [35.0000-300.0000]

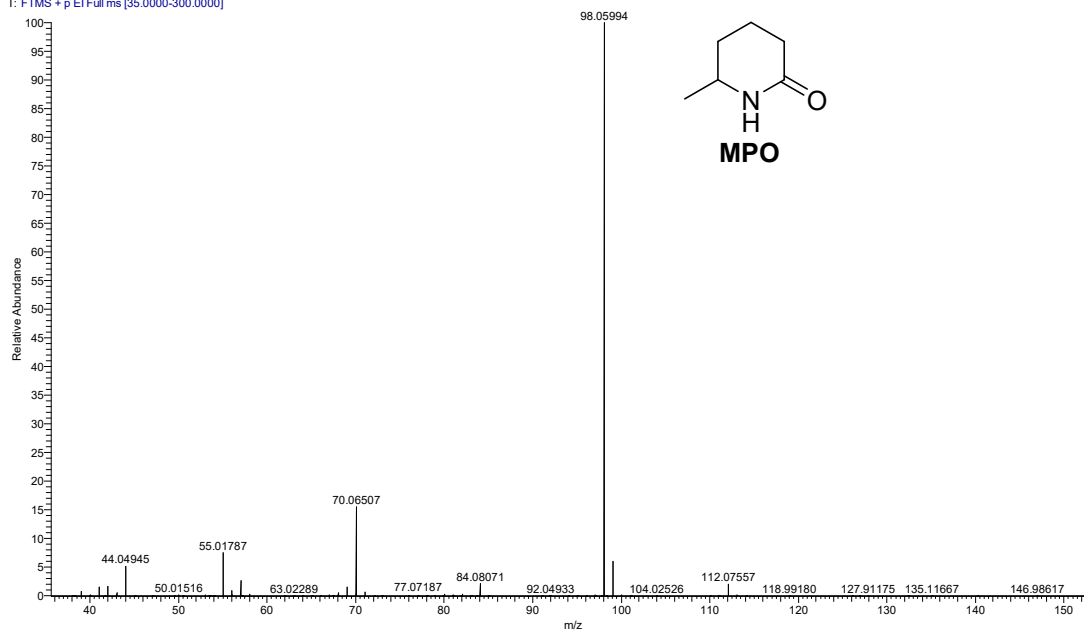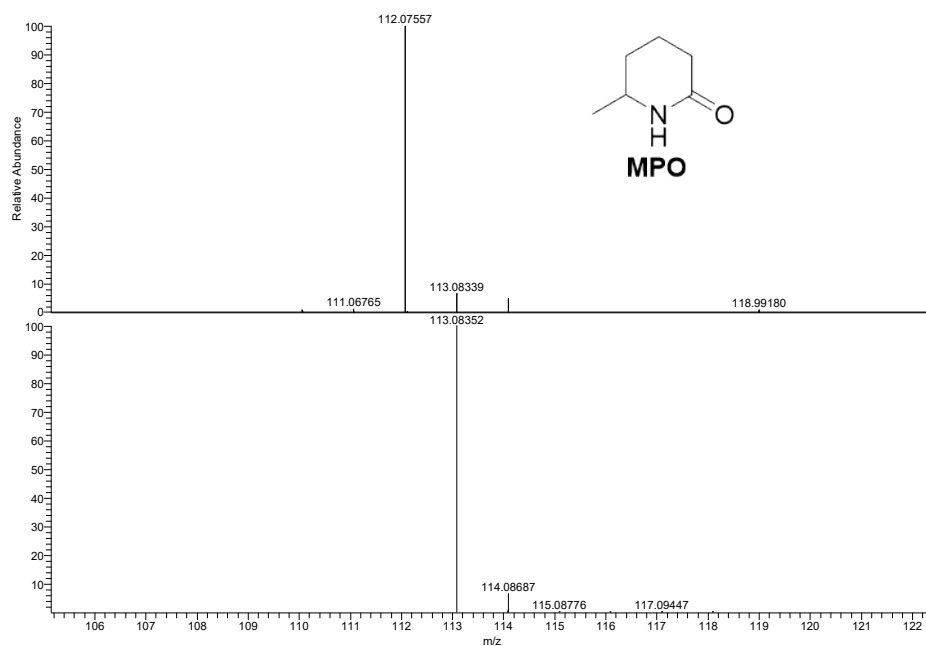

NL:  
1.31E7  
20220914-GC-MS-06CBF-  
2\_20220915155631#1174 RT:  
7.28 AV:1 SB:2 7.41, 7.46  
T: FTMS + p EI Full ms  
[35.0000-300.0000]

NL:  
9.31E5  
C6H11NO:  
C6H11N1O1  
pa C1rg 1



### 3. Supplementary references

1. B. Chen, Z. Xie, F. Peng, S. Li, J. Yang, T. Wu, H. Fan, Z. Zhang, M. Hou, S. Li, H. Liu and B. Han, *Angew. Chem. Int. Ed.*, 2021, **60**, 14405-14409.
